# Supplementary material for: Diaminotetrazine based mesoporous C3N6 with a well-ordered 3D cubic structure and its excellent photocatalytic performance for hydrogen evolution
Source: Royal Society of Chemistry journal article supplement (doi:10.1039/c7ta04041e), 2017-01-01
Supplement: c7ta04041e1.pdf [file c7ta04041e1.pdf]

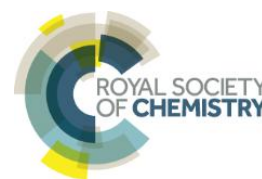

**Journal of Materials Chemistry A**

## **Supporting Information**

### **Diaminotetrazine Based Mesoporous C<sub>3</sub>N<sub>6</sub> with Well-Ordered 3D Cubic Structure and its Excellent Photocatalytic Performance on Hydrogen Evolution**

Siddulu Naidu Talapaneni,<sup>a,\*</sup> Gurudas P. Mane,<sup>a, c</sup> Dae-Hwan Park,<sup>a</sup> Kripal S. Lakhi,<sup>a</sup> Kavitha Ramadass,<sup>a</sup> Stalin Joseph,<sup>a</sup> William M. Skinner,<sup>a</sup> Ugo Ravon,<sup>b</sup> Khalid Al-Bahily,<sup>b</sup> and Ajayan Vinu<sup>a\*</sup>

<sup>a</sup>*Future Industries Institute (FII), Division of Information Technology, Engineering and Environment (DivITEE), Mawson Lakes Campus, University of South Australia, Adelaide, SA 5095, Australia.*

<sup>b</sup>*SABIC Corporate Research and Development Center at KAUST, Saudi Basic Industries Corporation, Thuwal 23955, Saudi Arabia.*

<sup>c</sup>*Bhabha Atomic Research Centre, Trombay, 400085, Mumbai, India.*

*\*To whom the correspondence should be addressed*

*Email: [Siddulu.Talapaneni@unisa.edu.au](mailto:Siddulu.Talapaneni@unisa.edu.au); [Ajayan.Vinu@unisa.edu.au](mailto:Ajayan.Vinu@unisa.edu.au)*

*Ph: +61-8-830-25384, Fax: +61-8-830-25639*

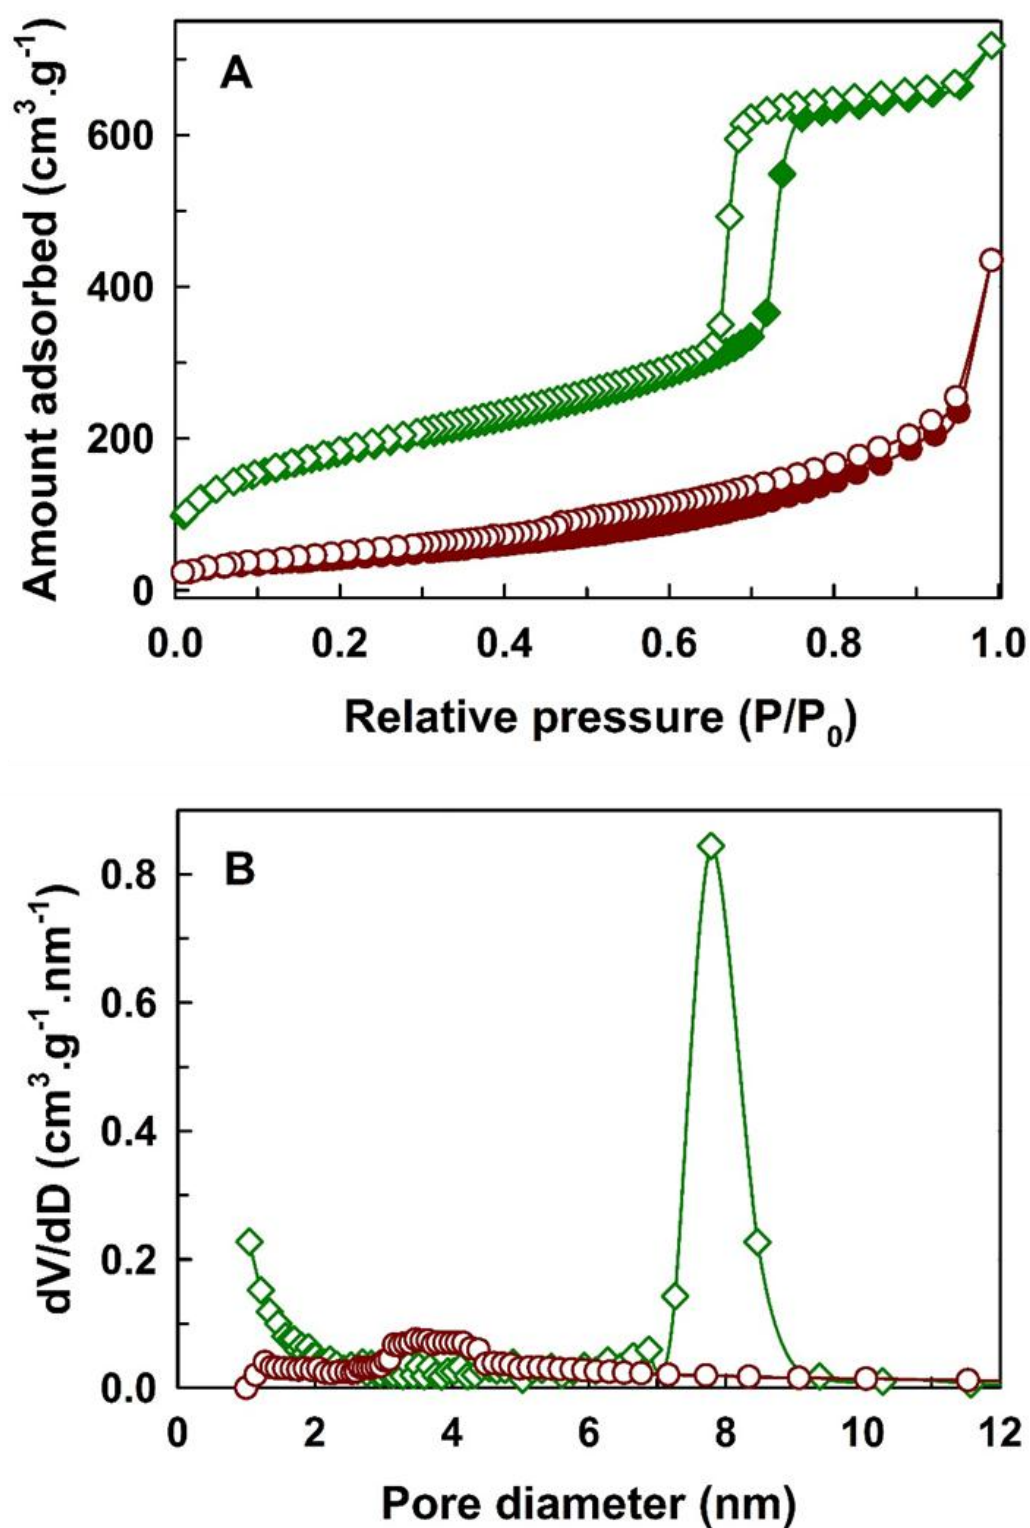

**Figure S1.** (A) Nitrogen adsorption–desorption isotherms and (B) BJH pore-size distributions of c-MCN-100 (circles) and KIT-6-100 (diamonds) silica template.

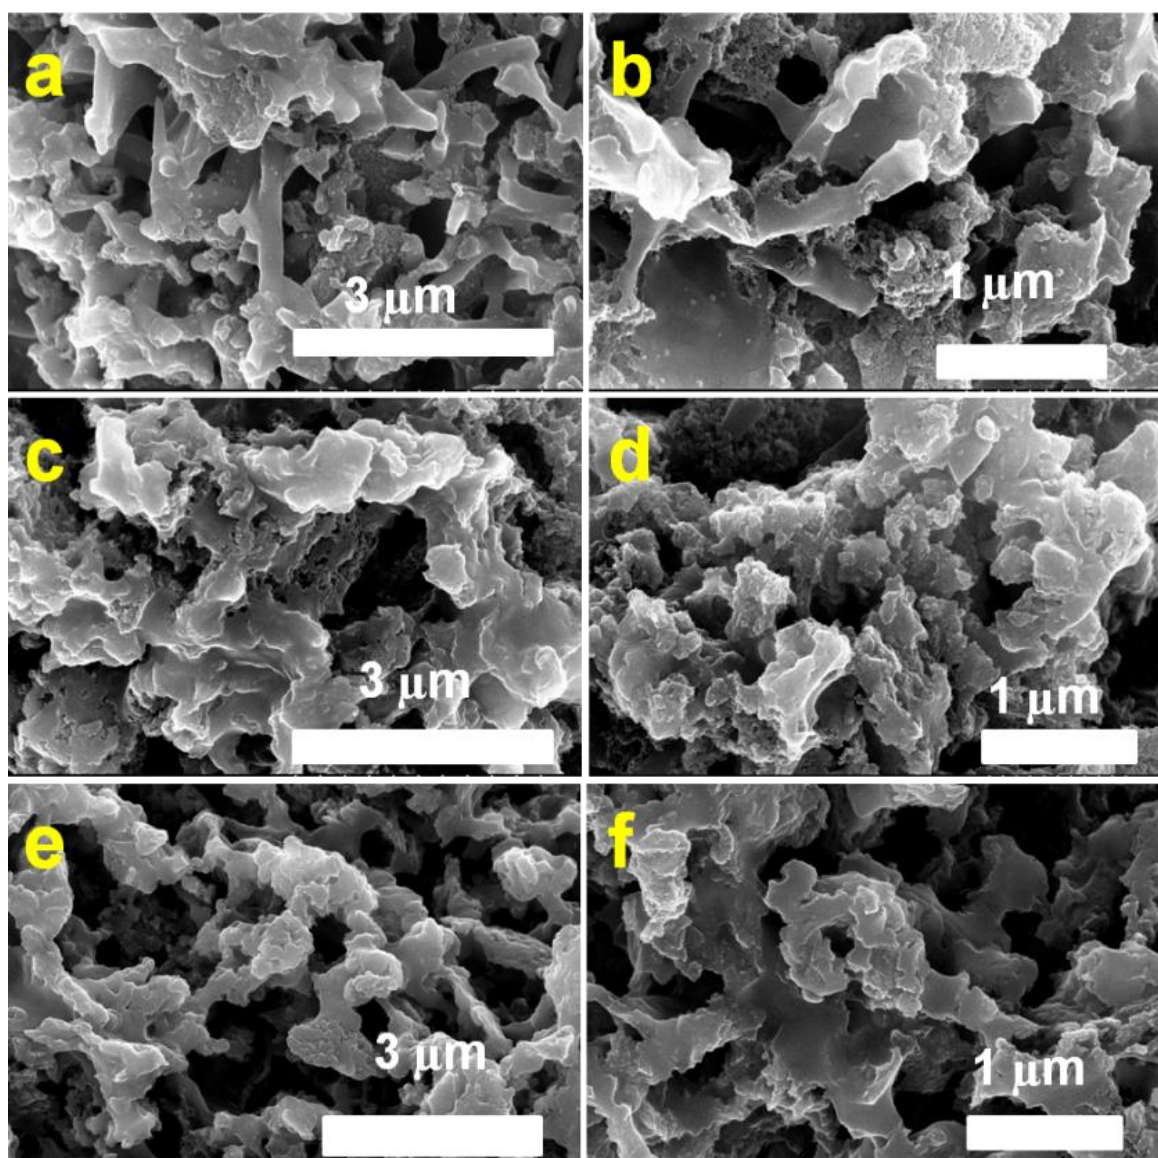

**Figure S2.** HRSEM images of (a-b) c-MCN-100, (c-d) c-MCN-130 and (e-f) c-MCN-150 samples at different magnifications.

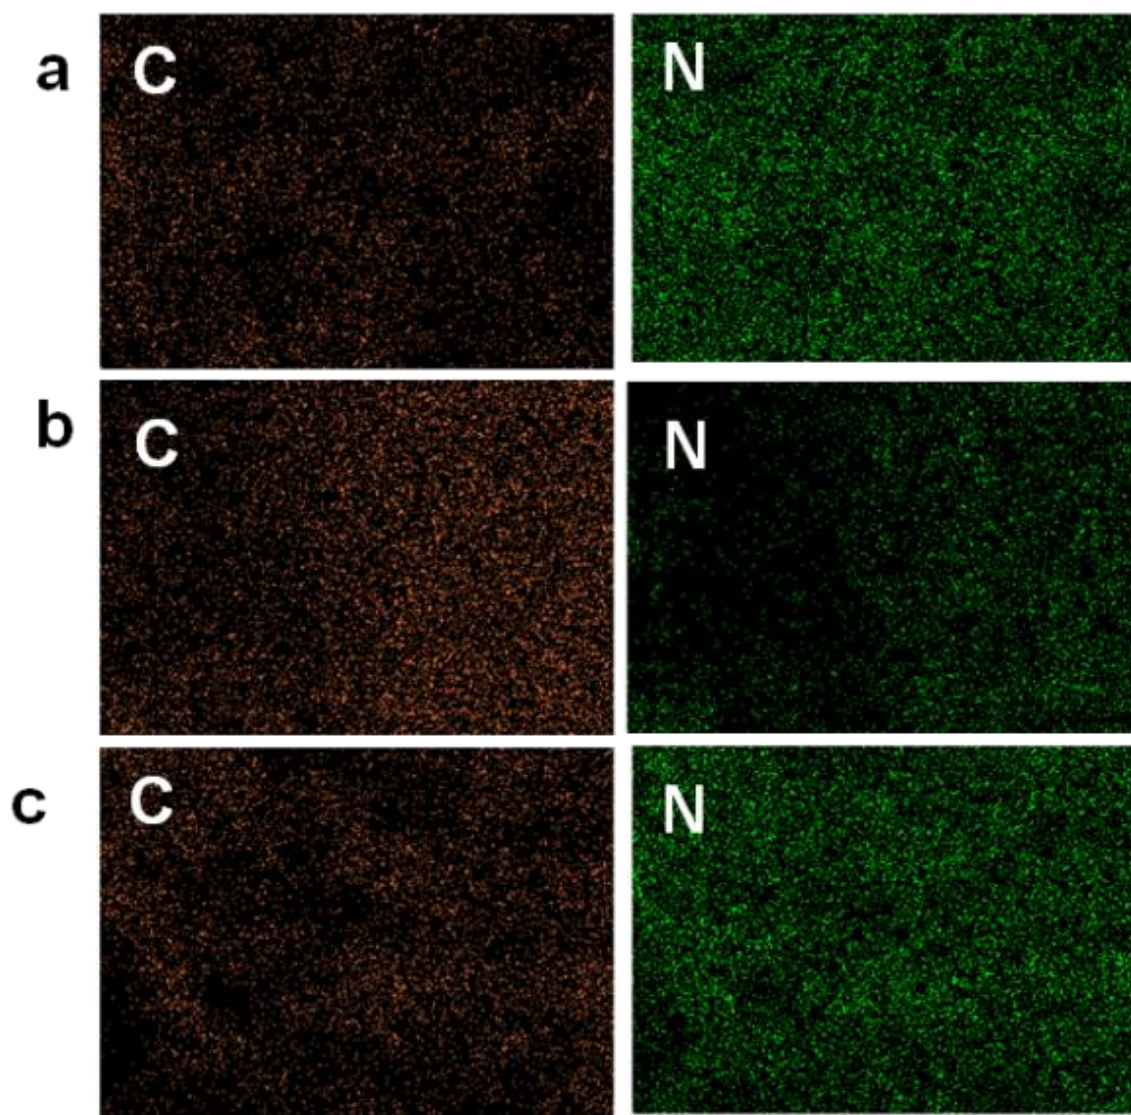

**Figure S3.** Elemental mappings of (a) c-MCN-100, (b) c-MCN-130 and (c) c-MCN-150.



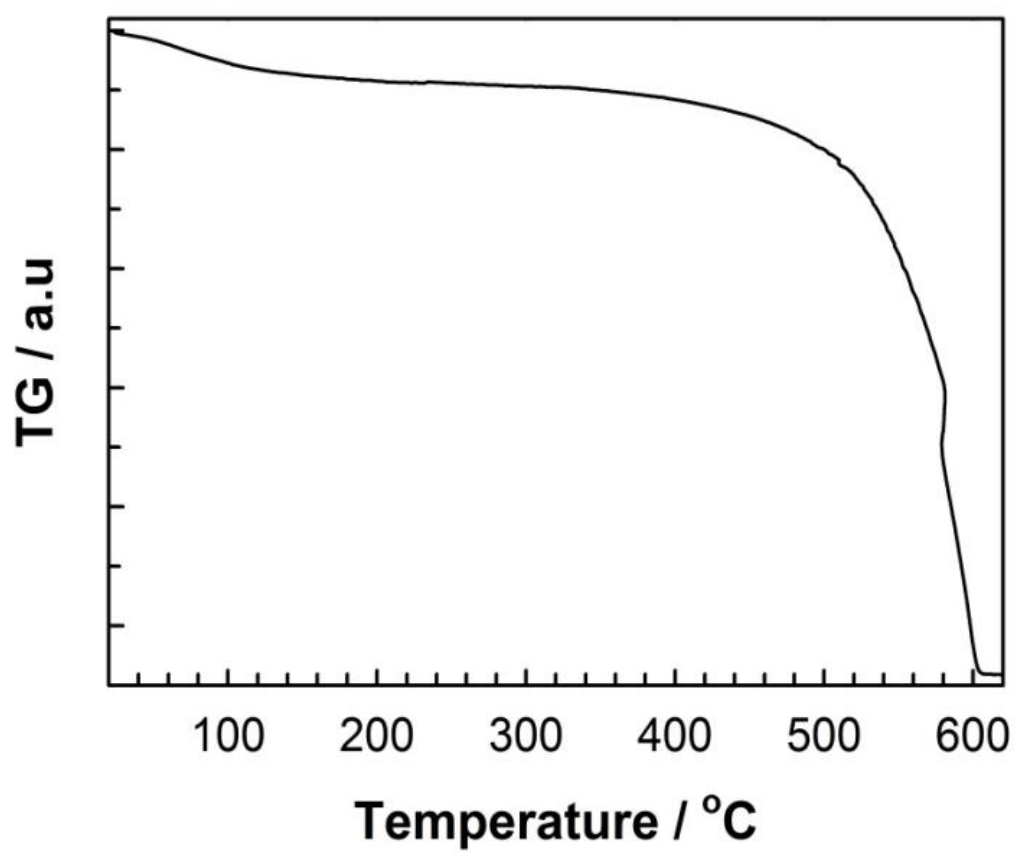

**Figure S4.** TG curve of c-MCN-150 under nitrogen atmosphere.

**Table S1** Textural parameters of KIT-6 silica templates having different pore diameters synthesized at 100, 130 and 150°C temperatures

|           | $d_{(211)}$ Spacing | Unit cell  | $A_{\text{BET}}$                     | $V_p$                                 | $d_{p, \text{BJH}}$ |
|-----------|---------------------|------------|--------------------------------------|---------------------------------------|---------------------|
| Material  | (nm)                | $a_0$ (nm) | ( $\text{m}^2 \cdot \text{g}^{-1}$ ) | ( $\text{cm}^3 \cdot \text{g}^{-1}$ ) | (nm)                |
| KIT-6-100 | 9.17                | 22.5       | 728                                  | 0.99                                  | 8.0                 |
| KIT-6-130 | 9.62                | 23.6       | 625                                  | 1.32                                  | 9.9                 |
| KIT-6-150 | 9.81                | 24.0       | 555                                  | 1.53                                  | 11.3                |

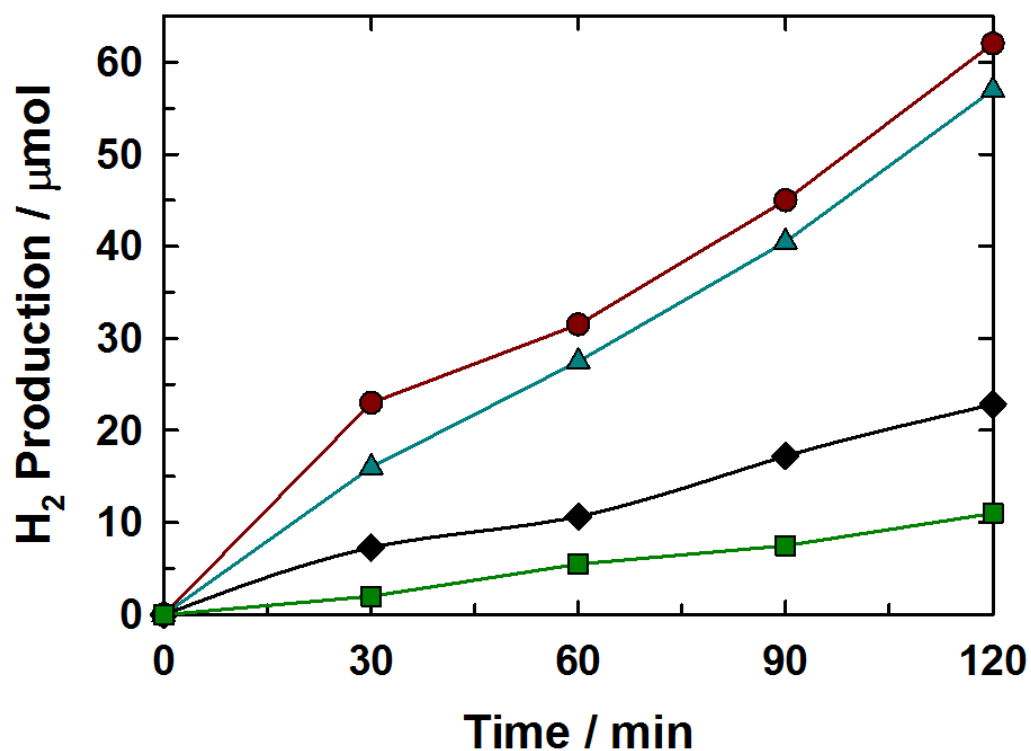

**Figure S5.** Time course of H<sub>2</sub> gas evolution using MCN-9 photocatalyst (circles) as a function of time, with reference to mesoporous C<sub>3</sub>N<sub>6</sub> with 2D structure (up triangles), 3D mesoporous C<sub>3</sub>N<sub>4</sub> and bulk non-porous C<sub>3</sub>N<sub>4</sub>.

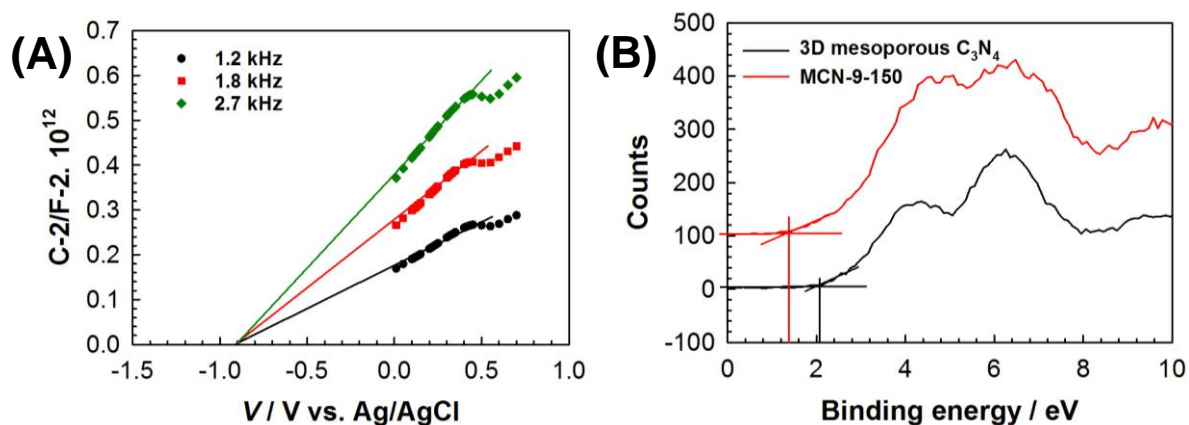

**Figure S6.** (A) Electrochemical Mott-Schottky plots of MCN-9-150 at different frequencies (B) XPS valence band spectra of 3D mesoporous C<sub>3</sub>N<sub>4</sub> and MCN-9-150.

**Table S2** The apparent quantum efficiency (AQE) for photocatalytic hydrogen evolution over MCN-9, mesoporous  $C_3N_6$  with 2D structure, bulk non-porous  $C_3N_6$ , 3D mesoporous  $C_3N_4$  and bulk non-porous  $C_3N_4$  photocatalysts, using diode laser as the incident light (405 nm)

| Sample name                           | AQE (%) |
|---------------------------------------|---------|
| MCN-9-150                             | 0.212   |
| mesoporous $C_3N_6$ with 2D structure | 0.185   |
| bulk non-porous $C_3N_6$              | 0.037   |
| 3D mesoporous $C_3N_4$                | 0.071   |
| bulk non-porous $C_3N_4$              | 0.037   |
